# Supplementary material for: Small molecules that inhibit TNF signalling by stabilising an asymmetric form of the trimer
Source: PubMed Central journal article supplement (PMC6923382; doi:10.1038/s41467-019-13616-1), 2019-12-19
Supplement: 41467_2019_13616_MOESM2_ESM.pdf [file 41467_2019_13616_MOESM2_ESM.pdf]

**Editorial Note:** This manuscript has been previously reviewed at another journal that is not operating a transparent peer review scheme. The manuscript was considered suitable for publication without further review at Nature Communications.
